# Supplementary material for: Andrographolide Exerts Antihyperglycemic Effect through Strengthening Intestinal Barrier Function and Increasing Microbial Composition of Akkermansia muciniphila
Source: Hindawi journal article supplement (doi:10.1155/2020/6538930), 2020-07-23
Supplement: f1 [file 6538930.f1.pdf]

## Supplementary information

**Andrographolide exerts antihyperglycemic effect through strengthening intestinal barrier function and increasing microbial composition of *Akkermansia muciniphila***

Hongming Su, Huihui Ke, Tao Bao, Jiahong Xie, Yang Xu, Lianghua Xie, Wei Chen\*

Department of Food Science and Nutrition, Zhejiang University, Hangzhou 310058, China.

**Supplementary Table 1. Primers used for quantitative RT-PCR.**

| <b>Primer</b>                      | <b>Forward</b>              | <b>Reverse</b>            |
|------------------------------------|-----------------------------|---------------------------|
| <i>ZO-1 (H)</i>                    | CTCCTGGATTTGGATTTGGA        | CTGTCCTTCAGCTGGTCCTC      |
| <i>Ocln (H)</i>                    | ATGGCTGCCTTTTGTTCAT         | ATGCCCAGGATAGCACTCAC      |
| <i>ZO-1 (M)</i>                    | AGGACACCAAAGCATGTGAG        | GGCATTCTGCTGGTTACA        |
| <i>Tlr2 (M)</i>                    | GCCTTTCAGGGAATTAAGCTCC      | GATCAACCGATGGACGTGTAAA    |
| <i>Cnr1 (M)</i>                    | CTGATGTTCTGGATCGGAGTC       | TCTGAGGTGTGAATGATGATGC    |
| <i>Glut2 (M)</i>                   | ACTTGAAGGATCAAAGCAATGT      | CAGTCCTGAAATTAGCCCACAA    |
| <i>Nrf2 (M)</i>                    | TAGATGACCATGAGTCGCTTGC      | GCCAAACTTGCTCCATGTCC      |
| <i>Cat (M)</i>                     | CCAGCGACCAGATGAAGCAG        | CCACTCTCTCAGGAATCCGC      |
| <i>Sod1 (M)</i>                    | CAGCATGGGTTCCACGTCCA        | CACATTGGCCACACCGTCCT      |
| <i>TNF-<math>\alpha</math> (M)</i> | AGGCACTCCCCAAAAGAT          | CAGTAGACAGAAGAGCGTGGTG    |
| <i>IL-6 (M)</i>                    | CTCCATCCAGTTGCCTTCTTG       | AATTAAGCCTCCGACTTGTGAAG   |
| <i>Ocln (M)</i>                    | ATGTCCGGCCGATGCTCTC         | TTTGGCTGCTCTTGGGTCTGTAT   |
| <i>Lyz1 (M)</i>                    | GCCAAGGTCTACAATCGTTGTGAGTTG | CAGTCAGCCAGCTTGACACCACG   |
| <i>Pla2g2 (M)</i>                  | AGGATTCCCCAAGGATGCCAC       | CAGCCGTTTCTGACAGGAGTTCTGG |
| <i>DefA (M)</i>                    | GGTGATCATCAGACCCAGCATCA     | AAGAGACTAAAAGTGGAGCAGC    |
| <i>Muc2 (M)</i>                    | GCTCGGAACTCCAGAAAGAAG       | GCCAGGGAATCGGTAGACAT      |
| <i>GAPDH (M)</i>                   | AGGTCGGTGTGAACGGATTTG       | TGTAGACCATGTAGTTGAGGTCA   |
| <i>GAPDH (H)</i>                   | CTGGGCTACACTGAGCACC         | AAGTGGTCGTTGAGGGCAATG     |

## Supplementary Fig. S1

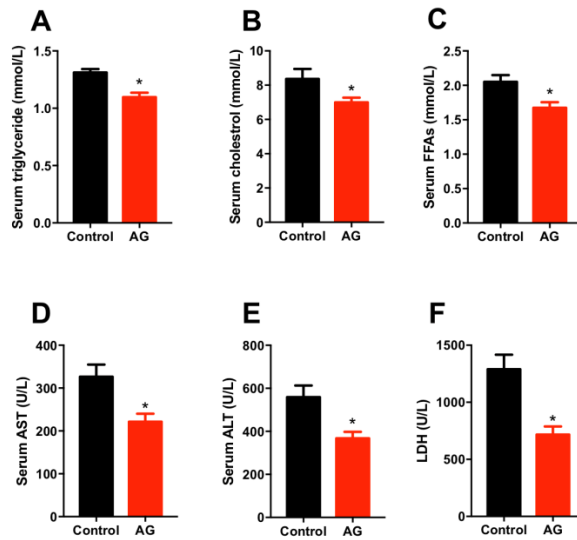

**Supplementary Figure S1. Andrographolide improved serum biochemical profiles.** (A) serum triglyceride, (B) cholesterol, (C) FFAs, (D) AST, (E) ALT and (F) LDH levels were determined. Control, db/db mice administered with vehicle; AG, db/db mice administered with 150 mg/kg andrographolide. Data represent means  $\pm$  s.e.m. (n=12), \* $p < 0.05$  versus control group.

## Supplementary Fig. S2

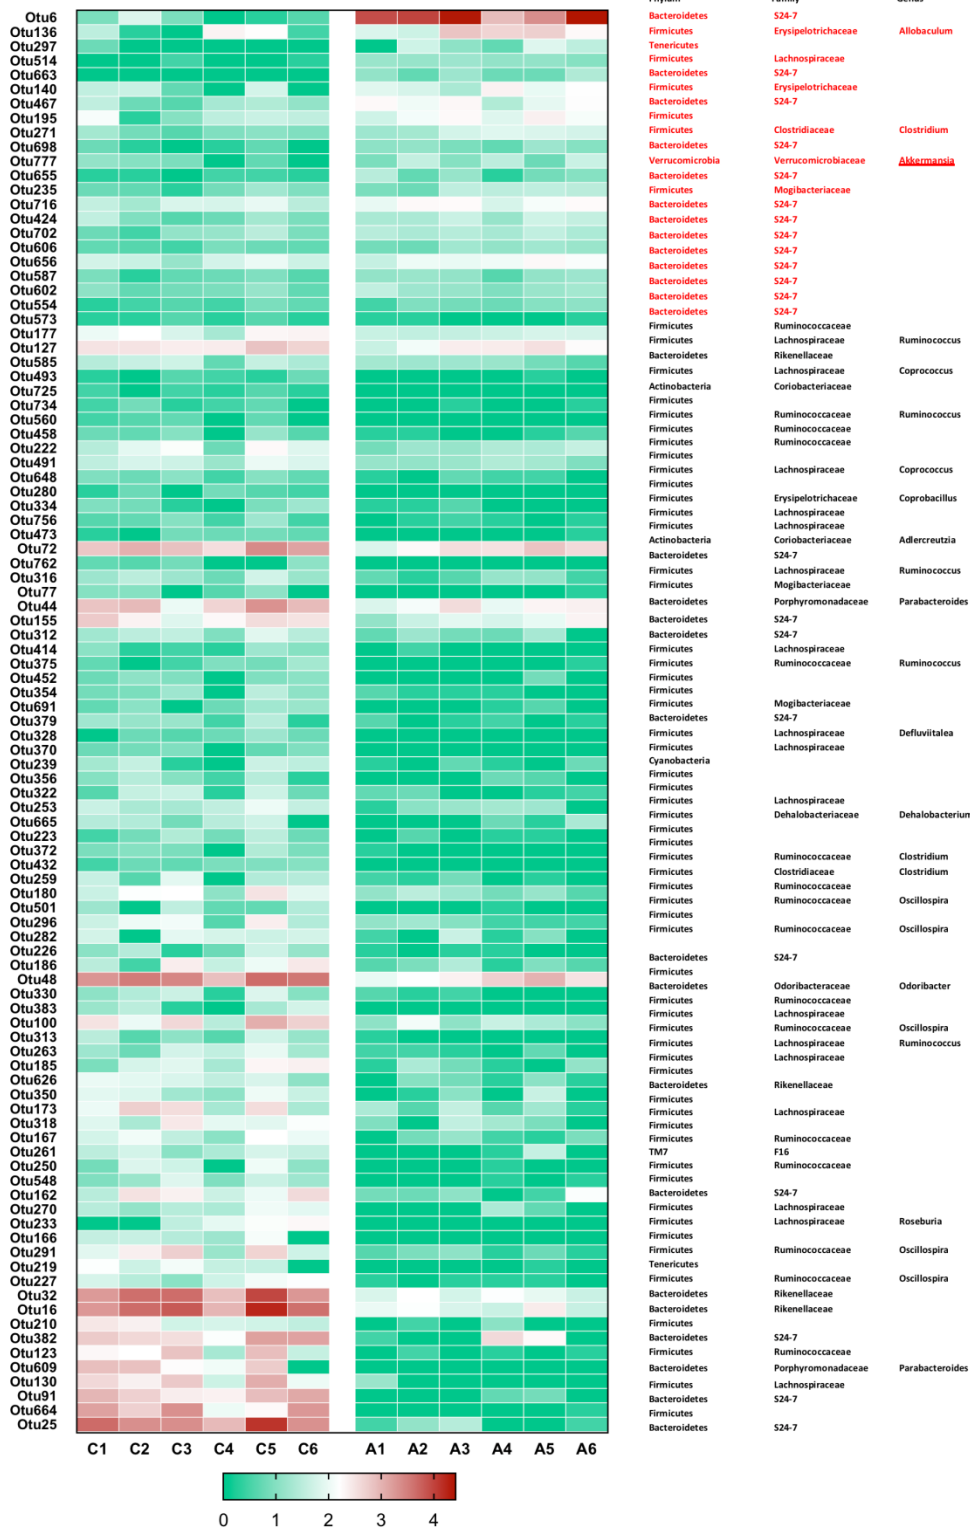

**Supplementary Figure S2. Heatmap of gut bacterial profiles.** OUT annotation of gut microbiota with significant difference between control (C) and andrographolide (A) groups. Control, db/db mice administered with vehicle; AG, db/db mice administered with 150 mg/kg andrographolide, n=6, \* $p < 0.05$  versus control group.
